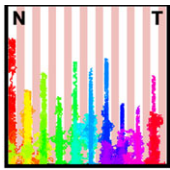

### Balanced ephrin/Eph signals drive topographic mapping

During development of the retinotectal axonal projection, which connects the retina to the optic tectum in the midbrain, the axons of neighbouring retinal ganglion cells project to neighbouring positions in the optic tectum (topographical mapping). However, although retinal fibres rigidly target their destinations in some experimental circumstances, in others they adapt to grossly diverse targets. Here (see p. 335), Franco Weth and colleagues present a surprisingly simple model that explains these hitherto puzzling discrepancies. In this model, topographical axonal mapping relies solely on the balance of forward and reverse signalling by the ephrin/Eph family of guidance molecules. To test their model, the researchers develop a novel ephrin/Eph (double-cue) stripe assay and show experimentally that the simultaneous presence of forward and reverse ephrin/Eph signalling is indeed sufficient for appropriate topographic growth decisions in chick embryonic nerve fibres. Moreover, using computer simulations, they show that their new model is capable of reproducing the discrepant data collected over the years on topographic mapping by the retinotectal axonal projection.

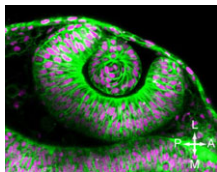

### Complex dance of eye morphogenesis unveiled

Optic cup morphogenesis (OCM), which generates the basic structure of the vertebrate eye, is usually depicted as a series of epithelial sheet folding events but experimental evidence to support this stepwise model is lacking. Now, Kristen Kwan, Chi-Bin Chien and colleagues investigate the cellular dynamics of OCM in zebrafish by combining four-dimensional time-lapse imaging and cell tracking (see p. 359). The researchers show that OCM depends on a complex set of sometimes unanticipated cell movements that are coordinated between the prospective neural retina, retinal pigmented epithelium and lens, the tissues that comprise the mature optic cup. Using their cell tracking data, the researchers construct subdomain fate maps for these three tissues that might provide clues to developmental signalling events. Finally, they show that similar movements occur during chick eye morphogenesis, which suggests that the complex choreography of cell movements that shape the vertebrate eye is conserved. These new insights into eye development could, therefore, help to improve our understanding of human eye defects.

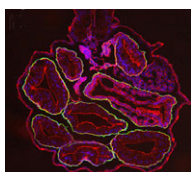

### Shedding light on Rho kinase signalling

Small-molecule inhibitors can be used as loss-of-function tools to investigate the molecular mechanisms of development but, although exposure to these inhibitors can be temporally controlled, their effects are not spatially restricted. Now, Nanette Nascone-Yoder and colleagues have generated a pharmacological agent that allows for photoactivatable, and hence spatiotemporally limited, inhibition of Rho kinase (see p. 437). Rho signalling is involved in many morphogenetic events, including primitive gut elongation in *Xenopus* embryos. The researchers install a photolabile 'caging' group on Rockout, a small-molecule inhibitor of Rho kinase, and show that caged Rockout (cRO) can permeate *Xenopus* embryonic tissues. When cultured in the dark, cRO-treated embryos develop normally, but UV irradiation of the right side of these embryos produces animals with a unilaterally shortened gut. Finally, the use of cRO reveals a differential requirement for Rho signalling on the left and right sides of the gut during intestinal rotation. Photocaging pharmacological inhibitors, the researchers conclude, might be a generalisable technique for producing loss-of-function reagents for use in multiple developmental contexts.

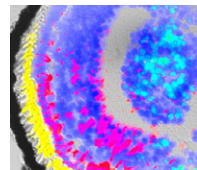

### The eyes have it: bioelectric induction

Endogenous steady-state ion currents, voltage gradients and electric fields produced by ion channels and pumps regulate patterning and have been implicated in adult eye wound healing. So might they play a role in eye development? On p. 313 Michael Levin and co-workers report that transmembrane voltage potential ( $V_{mem}$ ) is an important component of the eye induction cascade in *Xenopus*. The researchers identify a hyperpolarised cluster of cells in the anterior neural field of *Xenopus* embryos and show that depolarisation of the lineages from which these cells are derived results in malformed eyes. Remarkably, given our understanding of lineage restrictions and plasticity, manipulation of  $V_{mem}$  in non-eye cells induces ectopic eye formation far outside the anterior neural field. Other experiments show that a  $Ca^{2+}$  channel-dependent pathway transduces the  $V_{mem}$  signal and regulates the pattern of eye field transcription factor expression. This new information on the roles of voltage gradients as mediators of patterning during embryogenesis might have implications for the development of regenerative approaches to ocular diseases.

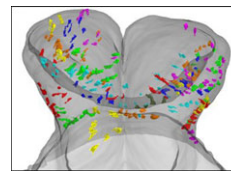

### Heads up for neural specification

During mouse embryogenesis, the anterior ectoderm develops into neural derivatives (the forebrain) and non-neural derivatives (the cephalic non-neural ectoderm). On p. 423, Kirstie Lawson, Anne Camus and co-workers use single-cell labelling and gene expression analysis to provide new insights into this cell fate choice. At late gastrulation, they report, the expression patterns of anterior ectoderm genes overlap significantly and correlate with areas of prospective fate but do not define lineages. They show that the rostral limit to forebrain contribution is more distal than previously reported. Finally, they report that some precursors of the anterior neural ridge, a signalling centre that is involved in forebrain development and patterning, are clonally related to neural ectoderm and are dispersed over a broad area of the anterior ectoderm where neural precursors also reside. Together, these results suggest that, although the segregation of neural and non-neural cells in the anterior ectoderm is incomplete at the gastrulation stage, there are elements of regionalisation in this tissue that preconfigure the organisation of the head.

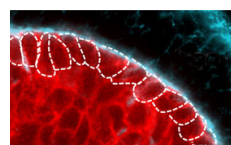

### ROCK solid epithelial organisation

The basement membrane is essential for epithelial tissue organisation and function but what restricts the basement membrane to the basal periphery of epithelial tissues and what are the basement membrane-mediated signals that regulate coordinated tissue organisation? On p. 411, Melinda Larsen and colleagues use cultures of embryonic mouse submandibular salivary glands to investigate these questions. They show that inhibition of the Rho kinase ROCK in these cultures results in basement membrane accumulation throughout the epithelial compartment. ROCK-mediated control of Par-1b localisation in the outer basal epithelial cell layer (which produces basement membrane) is responsible for normal basal basement membrane positioning, they report. Moreover, inhibition of Par-1b kinase activity prevents basement membrane deposition and disrupts tissue organisation. Conversely, overexpression of Par-1b drives ectopic basement membrane production. These and other results suggest that Par-1b is a master regulator of basement membrane deposition in developing salivary glands and that ROCK control of Par-1b function is essential for normal epithelial integrity and organisation.

Jane Bradbury
